# Supplementary material
Source: Research Square preprint supplement (doi:10.21203/rs.3.rs-9545186/v1)
Supplement: Supplementary file 1 [file 261033c89b24a07ad8debad8.xlsx]

## Sheet: Planilha1
Uppm - (MT7)	Uppm - (NIST)	Thppm - (MT7)	Thppm - (NIST)		Th/U MT7		Th/UNIST
10.6511	10.7186	208.299	200.23	Batch#1	19.5565		18.6806
14.2626	14.353	262.228	252.071		18.3857		17.5623
11.9965	12.0725	219.768	211.256		18.3194		17.4989
11.0308	11.1008	212.673	204.436		19.2799		18.4164
11.7233	11.7976	222.923	214.289		19.0154		18.1637
11.5738	11.6472	228.291	219.448		19.7248		18.8413
12.3173	12.3954	234.897	225.798		19.0704		18.2163
11.4012	11.4735	219.822	211.308		19.2805		18.417
12.7861	12.8672	235.634	226.507		18.429		17.6035
13.1779	13.2614	245.323	235.821		18.6163		17.7825
11.0004	11.0701	196.362	188.756		17.8505		17.051
11.3752	11.4473	216.29	207.912		19.0142		18.1626
12.455	12.534	234.817	225.722		18.8532		18.0088
12.97	13.0522	245.531	236.021		18.9308		18.0829
11.6645	11.7385	200.678	192.905		17.2041		16.4335
11.7846	11.8593	232.87	223.85		19.7605		18.8754
11.4094	11.4817	211.096	202.92		18.502		17.6733
12.037	12.1133	230.27	221.351		19.1302		18.2734
12.51	12.5893	250.802	241.087		20.0481		19.1502
12.3129	12.391	234.112	225.044		19.0135		18.1619
11.2487	11.32	210.441	202.29		18.708		17.8701
10.0147	10.0782	209.589	201.471		20.9281		19.9907
11.7631	11.8376	225.394	216.663		19.1611		18.3029
11.9424	12.0181	218.309	209.853		18.2802		17.4614
12.7223	12.803	219.442	210.942		17.2486		16.476
12.8042	12.8854	236.242	227.092		18.4504		17.624
11.6712	11.7452	216.907	208.506		18.5849		17.7525
11.5468	11.62	226.25	217.487		19.5942		18.7166
11.1929	11.2223	221.391	215.053	Batch#2	19.7795		19.1631
11.5412	11.5715	214.038	207.911		18.5456		17.9676
11.8178	11.8488	203.94	198.103		17.257		16.7192
13.7829	13.819	241.141	234.239		17.4957		16.9504
13.8156	13.8519	257.646	250.271		18.6489		18.0677
11.8091	11.8401	214.404	208.267		18.1558		17.59
11.5914	11.6218	225.947	219.479		19.4926		18.8851
11.8128	11.8438	225.212	218.766		19.0651		18.4709
11.9505	11.9819	224.61	218.181		18.795		18.2093
12.2486	12.2808	222.808	216.43		18.1905		17.6235
11.989	12.0204	238.442	231.617		19.8884		19.2686
13.3466	13.3817	231.719	225.086		17.3616		16.8205
12.9675	13.0015	237.172	230.383		18.2897		17.7197
13.0093	13.0434	212.658	206.571		16.3466		15.8372
11.0378	11.0667	208.748	202.773		18.9122		18.3228
11.4004	11.4303	204.385	198.535		17.9279		17.3692
10.6762	10.7042	209.396	203.402		19.6133		19.0021
9.91796	9.94397	189.247	183.83		19.0813		18.4866
11.7555	11.7863	213.32	207.213		18.1464		17.5809
9.8695	9.89539	207.863	201.913		21.0611		20.4047
10.7472	10.7754	211.092	205.05		19.6415		19.0294
11.2953	11.3249	200.988	195.235		17.794		17.2394
11.5447	11.575	211.184	205.139		18.2928		17.7227
11.9391	11.9704	233.645	226.957		19.5698		18.9598
10.6283	10.6562	213.857	207.736		20.1215		19.4944
16.2842	16.327	292.15	283.788		17.9407		17.3815
13.2067	13.2413	246.12	239.075		18.636		18.0552
13.314	13.3489	248.684	241.566		18.6784		18.0963
11.0338	11.0627	220.563	214.249		19.9898		19.3667
12.6667	12.6999	242.17	235.238		19.1187		18.5228
10.4472	10.4746	206.02	200.123		19.72		19.1054
11.9318	11.9631	223.554	217.155		18.7359		18.152
13.6634	13.6993	240.392	233.51		17.5938		17.0455
12.0558	12.0875	231.323	224.701		19.1876		18.5896
11.9749	12.0263	224.695	217.235		18.8067		18.1043
0.093019	0.0929112	0.0787071	0.0788511		0.0476967		0.0476919
max =16.28	max = 16.33	max = 292.2	max = 283.8
min = 9.87	min = 9.89	min = 189.2	min = 183.8
Uppm - (MT7)	Uppm - (NIST)	Thppm - (MT7)	Thppm - (NIST)
