# Supplementary material
Source: Research Square preprint supplement (doi:10.21203/rs.3.rs-9545186/v1)
Supplement: Supplementary file 2 [file 8e0d2b62c00736a988ce7830.xlsx]

## Sheet: Standards
Dur-2	NS	Area	RhoS	U(ppm)	σU (ppm)	𝝍-parameter	Age	Age (Ma)	σ Age (Ma)
	7	2.5e-05	280000	9.50756	0.142613	1.77677e-12	4.3268e+07	43.268	16.5204
	3	2.5e-05	120000	9.11405	0.136711	1.77677e-12	1.938e+07	19.38	11.238
	6	2.5e-05	240000	8.74824	0.131224	1.77677e-12	4.03151e+07	40.3151	16.6025
	7	2.5e-05	280000	9.28047	0.139207	1.77677e-12	4.43231e+07	44.3231	16.9233
	8	2.5e-05	320000	8.65898	0.129885	1.77677e-12	5.42488e+07	54.2488	19.4031
	4	2.5e-05	160000	7.93577	0.119037	1.77677e-12	2.96529e+07	29.6529	14.913
	5	2.5e-05	200000	7.926	0.11889	1.77677e-12	3.70904e+07	37.0904	16.7083
	3	2.5e-05	120000	9.08832	0.136325	1.77677e-12	1.94347e+07	19.4347	11.2698
	6	2.5e-05	240000	9.68972	0.145346	1.77677e-12	3.6409e+07	36.409	14.9939
	3	2.5e-05	120000	10.212	0.15318	1.77677e-12	1.72991e+07	17.2991	10.0314
	4	2.5e-05	160000	9.3108	0.139662	1.77677e-12	2.52823e+07	25.2823	12.7149
	4	2.5e-05	160000	8.15718	0.122358	1.77677e-12	2.88499e+07	28.8499	14.5091
	3	2.5e-05	120000	8.87381	0.133107	1.77677e-12	1.99038e+07	19.9038	11.5418
	7	2.5e-05	280000	8.91063	0.133659	1.77677e-12	4.61562e+07	46.1562	17.6232
	6	2.5e-05	240000	9.1015	0.136523	1.77677e-12	3.8755e+07	38.755	15.96
	5	2.5e-05	200000	9.19677	0.137952	1.77677e-12	3.19781e+07	31.9781	14.4053
	3	2.5e-05	120000	9.57552	0.143633	1.77677e-12	1.84473e+07	18.4473	10.6972
	5	2.5e-05	200000	8.7641	0.131461	1.77677e-12	3.35527e+07	33.5527	15.1146
	3	2.5e-05	120000	8.32722	0.124908	1.77677e-12	2.12081e+07	21.2081	12.2982
	4	2.5e-05	160000	7.9696	0.119544	1.77677e-12	2.95273e+07	29.5273	14.8498
	3	2.5e-05	120000	8.82179	0.132327	1.77677e-12	2.0021e+07	20.021	11.6098
	3	2.5e-05	120000	8.71281	0.130692	1.77677e-12	2.0271e+07	20.271	11.7548
	4	2.5e-05	160000	8.86593	0.132989	1.77677e-12	2.65483e+07	26.5483	13.3516
	5	2.5e-05	200000	8.97152	0.134573	1.77677e-12	3.27789e+07	32.7789	14.7661
	5	2.5e-05	200000	8.8255	0.132383	1.77677e-12	3.33199e+07	33.3199	15.0098
	6	2.5e-05	240000	7.74316	0.116147	1.77677e-12	4.55296e+07	45.5296	18.7499
	6	2.5e-05	240000	10.8584	0.162876	1.77677e-12	3.25001e+07	32.5001	13.3841
	8	2.5e-05	320000	12.1118	0.181677	1.77677e-12	3.88301e+07	38.8301	13.8883
	4	2.5e-05	160000	11.3419	0.170129	1.77677e-12	2.07621e+07	20.7621	10.4416
	5	2.5e-05	200000	9.28775	0.139316	1.77677e-12	3.16656e+07	31.6656	14.2646
	3	2.5e-05	120000	8.97058	0.134559	1.77677e-12	1.96894e+07	19.6894	11.4175
	5	2.5e-05	200000	8.37027	0.125554	1.77677e-12	3.51271e+07	35.1271	15.8239
	5	2.5e-05	200000	8.46212	0.126932	1.77677e-12	3.47469e+07	34.7469	15.6526
Dur-3	NS	Area	RhoS	U(ppm)	σU (ppm)	𝝍-parameter	Age	Age (Ma)	Err Age (Ma)
	5	2.5e-05	200000	8.65759	0.129864	1.77677e-12	3.39644e+07	33.9644	15.3001
	3	2.5e-05	120000	10.1415	0.152123	1.77677e-12	1.74191e+07	17.4191	10.101
	5	2.5e-05	200000	10.951	0.164265	1.77677e-12	2.68663e+07	26.8663	12.1026
	4	2.5e-05	160000	9.7366	0.146049	1.77677e-12	2.41787e+07	24.1787	12.1599
	3	2.5e-05	120000	9.91364	0.148705	1.77677e-12	1.7819e+07	17.819	10.3329
	6	2.5e-05	240000	8.89711	0.133457	1.77677e-12	3.96426e+07	39.6426	16.3255
	4	2.5e-05	160000	8.05918	0.120888	1.77677e-12	2.91999e+07	29.1999	14.6852
	7	2.5e-05	280000	8.84971	0.132746	1.77677e-12	4.64727e+07	46.4727	17.7441
	7	2.5e-05	280000	10.423	0.156345	1.77677e-12	3.94794e+07	39.4794	15.0739
	4	2.5e-05	160000	9.82003	0.1473	1.77677e-12	2.39737e+07	23.9737	12.0568
	5	2.5e-05	200000	9.3965	0.140948	1.77677e-12	3.13e+07	31.3	14.0999
	5	2.5e-05	200000	8.86968	0.133045	1.77677e-12	3.31544e+07	33.1544	14.9352
	7	2.5e-05	280000	9.32588	0.139888	1.77677e-12	4.4108e+07	44.108	16.8412
	6	2.5e-05	240000	8.84808	0.132721	1.77677e-12	3.98616e+07	39.8616	16.4157
	7	2.5e-05	280000	8.7195	0.130792	1.77677e-12	4.71642e+07	47.1642	18.0081
	5	2.5e-05	200000	9.41452	0.141218	1.77677e-12	3.12403e+07	31.2403	14.0729
	5	2.5e-05	200000	8.94053	0.134108	1.77677e-12	3.28923e+07	32.8923	14.8171
	3	2.5e-05	120000	9.09798	0.13647	1.77677e-12	1.94141e+07	19.4141	11.2579
	6	2.5e-05	240000	9.67617	0.145142	1.77677e-12	3.64599e+07	36.4599	15.0148
	5	2.5e-05	200000	8.44175	0.126626	1.77677e-12	3.48305e+07	34.8305	15.6902
	5	2.5e-05	200000	9.06284	0.135943	1.77677e-12	3.24495e+07	32.4495	14.6177
	6	2.5e-05	240000	7.77189	0.116578	1.77677e-12	4.53619e+07	45.3619	18.6808
	4	2.5e-05	160000	8.05316	0.120797	1.77677e-12	2.92216e+07	29.2216	14.6961
	4	2.5e-05	160000	8.2719	0.124078	1.77677e-12	2.84506e+07	28.4506	14.3083
	4	2.5e-05	160000	7.43959	0.111594	1.77677e-12	3.16258e+07	31.6258	15.9052
	7	2.5e-05	280000	8.154	0.12231	1.77677e-12	5.04224e+07	50.4224	19.2521
	5	2.5e-05	200000	8.70885	0.130633	1.77677e-12	3.3765e+07	33.765	15.2103
	4	2.5e-05	160000	8.72694	0.130904	1.77677e-12	2.69702e+07	26.9702	13.5638
	6	2.5e-05	240000	8.93589	0.134038	1.77677e-12	3.94711e+07	39.4711	16.2549
	6	2.5e-05	240000	9.01109	0.135166	1.77677e-12	3.91427e+07	39.1427	16.1196
	5	2.5e-05	200000	8.14333	0.12215	1.77677e-12	3.61033e+07	36.1033	16.2636
	6	2.5e-05	240000	9.21259	0.138189	1.77677e-12	3.82891e+07	38.2891	15.7681
	3	2.5e-05	120000	8.17721	0.122658	1.77677e-12	2.15965e+07	21.5965	12.5234
Dur-4	NS	Area	RhoS	U(ppm)	σU (ppm)	𝝍-parameter	Age	Age (Ma)	Err Age (Ma)
	4	2.5e-05	160000	8.68167	0.130225	1.77677e-12	2.71106e+07	27.1106	13.6344
	3	2.5e-05	120000	6.91591	0.103739	1.77677e-12	2.55274e+07	25.5274	14.8028
	7	2.5e-05	280000	8.03997	0.1206	1.77677e-12	5.11347e+07	51.1347	19.5241
	3	2.5e-05	120000	8.36988	0.125548	1.77677e-12	2.11002e+07	21.1002	12.2356
	7	2.5e-05	280000	8.23637	0.123546	1.77677e-12	4.99201e+07	49.9201	19.0603
	3	2.5e-05	120000	8.95139	0.134271	1.77677e-12	1.97316e+07	19.7316	11.4419
	4	2.5e-05	160000	9.45892	0.141884	1.77677e-12	2.48872e+07	24.8872	12.5162
	6	2.5e-05	240000	9.83965	0.147595	1.77677e-12	3.58558e+07	35.8558	14.766
	2	2.5e-05	80000	7.75936	0.11639	1.77677e-12	1.51806e+07	15.1806	10.7657
	6	2.5e-05	240000	8.89443	0.133417	1.77677e-12	3.96545e+07	39.6545	16.3304
	7	2.5e-05	280000	8.81028	0.132154	1.77677e-12	4.668e+07	46.68	17.8232
	2	2.5e-05	80000	8.76423	0.131463	1.77677e-12	1.34419e+07	13.4419	9.53261
	3	2.5e-05	120000	8.95695	0.134354	1.77677e-12	1.97193e+07	19.7193	11.4348
	7	2.5e-05	280000	8.85951	0.132893	1.77677e-12	4.64215e+07	46.4215	17.7245
	5	2.5e-05	200000	8.27191	0.124079	1.77677e-12	3.55436e+07	35.5436	16.0115
	3	2.5e-05	120000	8.23899	0.123585	1.77677e-12	2.14349e+07	21.4349	12.4296
	6	2.5e-05	240000	8.48453	0.127268	1.77677e-12	4.15641e+07	41.5641	17.1168
	5	2.5e-05	200000	8.89205	0.133381	1.77677e-12	3.30711e+07	33.0711	14.8977
	7	2.5e-05	280000	8.64927	0.129739	1.77677e-12	4.75457e+07	47.5457	18.1538
	5	2.5e-05	200000	8.58859	0.128829	1.77677e-12	3.42365e+07	34.2365	15.4227
	7	2.5e-05	280000	8.13036	0.121955	1.77677e-12	5.05684e+07	50.5684	19.3079
	5	2.5e-05	200000	7.92085	0.118813	1.77677e-12	3.71145e+07	37.1145	16.7191
	4	2.5e-05	160000	7.86729	0.118009	1.77677e-12	2.99104e+07	29.9104	15.0425
	4	2.5e-05	160000	7.251	0.108765	1.77677e-12	3.24462e+07	32.4462	16.3178
	5	2.5e-05	200000	7.14598	0.10719	1.77677e-12	4.11262e+07	41.1262	18.5263
	3	2.5e-05	120000	8.00531	0.12008	1.77677e-12	2.20595e+07	22.0595	12.7919
	6	2.5e-05	240000	8.54817	0.128223	1.77677e-12	4.12556e+07	41.2556	16.9898
	6	2.5e-05	240000	7.88201	0.11823	1.77677e-12	4.47304e+07	44.7304	18.4208
	7	2.5e-05	280000	8.35681	0.125352	1.77677e-12	4.92034e+07	49.2034	18.7867
	5	2.5e-05	200000	8.4393	0.12659	1.77677e-12	3.48406e+07	34.8406	15.6948
	3	2.5e-05	120000	7.1747	0.107621	1.77677e-12	2.46084e+07	24.6084	14.2699
	3	2.5e-05	120000	7.8925	0.118387	1.77677e-12	2.23743e+07	22.3743	12.9744
Dur-5	NS	Area	RhoS	U(ppm)	σU (ppm)	𝝍-parameter	Age	Age (Ma)	Err Age (Ma)
	5	2.5e-05	200000	8.70345	0.130552	1.77677e-12	3.37859e+07	33.7859	15.2197
	7	2.5e-05	280000	8.72161	0.130824	1.77677e-12	4.71528e+07	47.1528	18.0038
	4	2.5e-05	160000	7.60671	0.114101	1.77677e-12	3.09326e+07	30.9326	15.5566
	3	2.5e-05	120000	7.25663	0.108849	1.77677e-12	2.43311e+07	24.3311	14.1091
	5	2.5e-05	200000	8.41567	0.126235	1.77677e-12	3.49381e+07	34.9381	15.7387
	3	2.5e-05	120000	7.20503	0.108075	1.77677e-12	2.4505e+07	24.505	14.21
	5	2.5e-05	200000	8.14064	0.12211	1.77677e-12	3.61152e+07	36.1152	16.269
	4	2.5e-05	160000	8.26385	0.123958	1.77677e-12	2.84783e+07	28.4783	14.3223
	4	2.5e-05	160000	8.41468	0.12622	1.77677e-12	2.79689e+07	27.9689	14.0661
	4	2.5e-05	160000	7.93338	0.119001	1.77677e-12	2.96618e+07	29.6618	14.9175
	3	2.5e-05	120000	8.3864	0.125796	1.77677e-12	2.10587e+07	21.0587	12.2115
	4	2.5e-05	160000	7.55473	0.113321	1.77677e-12	3.11449e+07	31.1449	15.6634
	3	2.5e-05	120000	7.85372	0.117806	1.77677e-12	2.24845e+07	22.4845	13.0383
	3	2.5e-05	120000	7.99444	0.119917	1.77677e-12	2.20894e+07	22.0894	12.8092
	5	2.5e-05	200000	6.48901	0.0973352	1.77677e-12	4.52753e+07	45.2753	20.3953
	6	2.5e-05	240000	7.60993	0.114149	1.77677e-12	4.63239e+07	46.3239	19.077
	6	2.5e-05	240000	7.79086	0.116863	1.77677e-12	4.52519e+07	45.2519	18.6355
	3	2.5e-05	120000	7.85382	0.117807	1.77677e-12	2.24842e+07	22.4842	13.0382
	2	2.5e-05	80000	9.31975	0.139796	1.77677e-12	1.26414e+07	12.6414	8.96495
	3	2.5e-05	120000	8.76748	0.131512	1.77677e-12	2.01448e+07	20.1448	11.6816
	4	2.5e-05	160000	7.07401	0.10611	1.77677e-12	3.32559e+07	33.2559	16.725
	7	2.5e-05	280000	7.21499	0.108225	1.77677e-12	5.69558e+07	56.9558	21.7467
	4	2.5e-05	160000	9.18381	0.137757	1.77677e-12	2.56312e+07	25.6312	12.8904
	5	2.5e-05	200000	9.01629	0.135244	1.77677e-12	3.26166e+07	32.6166	14.6929
	4	2.5e-05	160000	8.0917	0.121376	1.77677e-12	2.90828e+07	29.0828	14.6263
	10	2.5e-05	400000	8.0121	0.120182	1.77677e-12	7.31782e+07	73.1782	23.4772
	4	2.5e-05	160000	9.09773	0.136466	1.77677e-12	2.58732e+07	25.8732	13.0121
	5	2.5e-05	200000	7.20568	0.108085	1.77677e-12	4.07865e+07	40.7865	18.3733
	3	2.5e-05	120000	9.21397	0.13821	1.77677e-12	1.91701e+07	19.1701	11.1164
	5	2.5e-05	200000	9.55538	0.143331	1.77677e-12	3.07808e+07	30.7808	13.866
	4	2.5e-05	160000	7.02875	0.105431	1.77677e-12	3.34695e+07	33.4695	16.8325
	7	2.5e-05	280000	8.60975	0.129146	1.77677e-12	4.77632e+07	47.7632	18.2368
	4	2.5e-05	160000	7.44767	0.111715	1.77677e-12	3.15915e+07	31.5915	15.888
FCT-1	NS	Area	RhoS	U(ppm)	σU (ppm)	𝝍-parameter	Age	Age (Ma)	Err Age (Ma)
	4	2.5e-05	160000	14.5941	0.218911	1.77677e-12	1.57528e+07	15.7528	7.92239
	5	2.5e-05	200000	15.1704	0.227556	1.77677e-12	1.89383e+07	18.9383	8.5312
	5	2.5e-05	200000	14.4879	0.217319	1.77677e-12	1.98291e+07	19.8291	8.93249
	6	2.5e-05	240000	12.9737	0.194605	1.77677e-12	2.65583e+07	26.5583	10.9372
	7	2.5e-05	280000	13.775	0.206625	1.77677e-12	2.91762e+07	29.1762	11.14
	8	2.5e-05	320000	11.3578	0.170368	1.77677e-12	4.04053e+07	40.4053	14.4517
	8	2.5e-05	320000	15.6574	0.234861	1.77677e-12	2.93351e+07	29.3351	10.4922
	3	2.5e-05	120000	9.38257	0.140739	1.77677e-12	1.83733e+07	18.3733	10.6543
	4	2.5e-05	160000	14.0794	0.211191	1.77677e-12	1.6328e+07	16.328	8.21165
	4	2.5e-05	160000	14.5533	0.218299	1.77677e-12	1.5797e+07	15.797	7.94459
	4	2.5e-05	160000	12.9861	0.194792	1.77677e-12	1.77007e+07	17.7007	8.902
	4	2.5e-05	160000	4.22312	0.0633469	1.77677e-12	5.42754e+07	54.2754	27.2961
	12	2.5e-05	480000	13.6812	0.205219	1.77677e-12	5.02768e+07	50.2768	14.7664
	7	2.5e-05	280000	16.3164	0.244746	1.77677e-12	2.46405e+07	24.6405	9.40815
	4	2.5e-05	160000	14.8042	0.222063	1.77677e-12	1.55295e+07	15.5295	7.81009
	13	2.5e-05	520000	14.864	0.22296	1.77677e-12	5.01331e+07	50.1331	14.1665
	6	2.5e-05	240000	12.1817	0.182726	1.77677e-12	2.82811e+07	28.2811	11.6467
	6	2.5e-05	240000	12.8224	0.192336	1.77677e-12	2.6871e+07	26.871	11.0659
	4	2.5e-05	160000	12.8193	0.192289	1.77677e-12	1.79307e+07	17.9307	9.01771
	7	2.5e-05	280000	13.5989	0.203984	1.77677e-12	2.95532e+07	29.5532	11.2839
	7	2.5e-05	280000	13.6341	0.204511	1.77677e-12	2.94771e+07	29.4771	11.2549
	7	2.5e-05	280000	15.9451	0.239176	1.77677e-12	2.52132e+07	25.2132	9.62682
	5	2.5e-05	200000	18.5744	0.278616	1.77677e-12	1.54718e+07	15.4718	6.96964
	6	2.5e-05	240000	5.22098	0.0783147	1.77677e-12	6.57941e+07	65.7941	27.0952
	5	2.5e-05	200000	13.5022	0.202532	1.77677e-12	2.12743e+07	21.2743	9.58355
	8	2.5e-05	320000	18.9535	0.284303	1.77677e-12	2.42432e+07	24.2432	8.67103
	3	2.5e-05	120000	14.8131	0.222196	1.77677e-12	1.16437e+07	11.6437	6.75193
	6	2.5e-05	240000	11.5112	0.172668	1.77677e-12	2.99245e+07	29.9245	12.3235
	5	2.5e-05	200000	12.0291	0.180436	1.77677e-12	2.38748e+07	23.8748	10.755
	8	2.5e-05	320000	15.5164	0.232746	1.77677e-12	2.96012e+07	29.6012	10.5874
	6	2.5e-05	240000	3.81177	0.0571766	1.77677e-12	8.99491e+07	89.9491	37.0426
	9	2.5e-05	360000	11.5874	0.173811	1.77677e-12	4.45411e+07	44.5411	15.0413
FCT-2	NS	Area	RhoS	U(ppm)	σU (ppm)	𝝍-parameter	Age	Age (Ma)	Err Age (Ma)
	7	2.5e-05	280000	13.7685	0.206528	1.77677e-12	2.919e+07	29.19	11.1452
	6	2.5e-05	240000	17.9632	0.269448	1.77677e-12	1.91923e+07	19.1923	7.90373
	4	2.5e-05	160000	9.71662	0.145749	1.77677e-12	2.36458e+07	23.6458	11.8919
	6	2.5e-05	240000	13.3534	0.200302	1.77677e-12	2.58045e+07	25.8045	10.6267
	6	2.5e-05	240000	14.2107	0.21316	1.77677e-12	2.42508e+07	24.2508	9.98691
	7	2.5e-05	280000	12.6056	0.189085	1.77677e-12	3.18761e+07	31.8761	12.1708
	5	2.5e-05	200000	16.0305	0.240458	1.77677e-12	1.79236e+07	17.9236	8.0741
	8	2.5e-05	320000	14.011	0.210165	1.77677e-12	3.27735e+07	32.7735	11.7221
	5	2.5e-05	200000	12.8579	0.192869	1.77677e-12	2.23384e+07	22.3384	10.0629
	10	2.5e-05	400000	14.1248	0.211873	1.77677e-12	4.0612e+07	40.612	13.0292
	8	2.5e-05	320000	15.0084	0.225126	1.77677e-12	3.06006e+07	30.6006	10.9449
	7	2.5e-05	280000	13.3096	0.199644	1.77677e-12	3.01941e+07	30.1941	11.5286
	6	2.5e-05	240000	12.5282	0.187923	1.77677e-12	2.75007e+07	27.5007	11.3253
	6	2.5e-05	240000	14.1137	0.211705	1.77677e-12	2.44171e+07	24.4171	10.0554
	7	2.5e-05	280000	15.6863	0.235294	1.77677e-12	2.56284e+07	25.6284	9.78536
	4	2.5e-05	160000	12.2285	0.183428	1.77677e-12	1.87957e+07	18.7957	9.45272
	5	2.5e-05	200000	8.3218	0.124827	1.77677e-12	3.44824e+07	34.4824	15.5334
	4	2.5e-05	160000	12.1499	0.182248	1.77677e-12	1.89172e+07	18.9172	9.51383
	15	2.5e-05	600000	9.43964	0.141595	1.77677e-12	9.07988e+07	90.7988	23.9533
	7	2.5e-05	280000	15.4911	0.232367	1.77677e-12	2.59506e+07	25.9506	9.90837
	5	2.5e-05	200000	14.2354	0.213532	1.77677e-12	2.01802e+07	20.1802	9.09067
	5	2.5e-05	200000	15.0517	0.225776	1.77677e-12	1.90874e+07	19.0874	8.59838
	7	2.5e-05	280000	14.616	0.21924	1.77677e-12	2.75011e+07	27.5011	10.5004
	6	2.5e-05	240000	14.5615	0.218423	1.77677e-12	2.36675e+07	23.6675	9.7467
	6	2.5e-05	240000	12.2144	0.183216	1.77677e-12	2.82055e+07	28.2055	11.6155
	8	2.5e-05	320000	11.7996	0.176994	1.77677e-12	3.88972e+07	38.8972	13.9123
	8	2.5e-05	320000	7.95321	0.119298	1.77677e-12	5.76251e+07	57.6251	20.6107
	6	2.5e-05	240000	14.1879	0.212818	1.77677e-12	2.42896e+07	24.2896	10.0029
	2	2.5e-05	80000	12.0726	0.181089	1.77677e-12	9.52608e+06	9.52608	6.75564
	6	2.5e-05	240000	12.0068	0.180103	1.77677e-12	2.86921e+07	28.6921	11.8159
	4	2.5e-05	160000	12.0484	0.180726	1.77677e-12	1.90763e+07	19.0763	9.59385
	7	2.5e-05	280000	13.6175	0.204262	1.77677e-12	2.9513e+07	29.513	11.2686
FCT-3	NS	Area	RhoS	U(ppm)	σU (ppm)	𝝍-parameter	Age	Age (Ma)	Err Age (Ma)
	4	2.5e-05	160000	14.1986	0.212978	1.77677e-12	1.61911e+07	16.1911	8.14281
	6	2.5e-05	240000	15.5589	0.233383	1.77677e-12	2.2153e+07	22.153	9.123
	4	2.5e-05	160000	16.7019	0.250529	1.77677e-12	1.37669e+07	13.7669	6.92364
	1	2.5e-05	40000	5.24398	0.0786597	1.77677e-12	1.09642e+07	10.9642	10.9802
	7	2.5e-05	280000	4.21662	0.0632493	1.77677e-12	9.48291e+07	94.8291	36.2074
	8	2.5e-05	320000	13.0076	0.195114	1.77677e-12	3.52947e+07	35.2947	12.6238
	8	2.5e-05	320000	13.0316	0.195475	1.77677e-12	3.52298e+07	35.2298	12.6006
	7	2.5e-05	280000	22.0488	0.330732	1.77677e-12	1.82434e+07	18.2434	6.96563
	4	2.5e-05	160000	13.4248	0.201372	1.77677e-12	1.71231e+07	17.1231	8.61152
	6	2.5e-05	240000	15.4262	0.231393	1.77677e-12	2.23432e+07	22.3432	9.20132
	4	2.5e-05	160000	10.212	0.15318	1.77677e-12	2.25008e+07	22.5008	11.3161
	5	2.5e-05	200000	11.0683	0.166025	1.77677e-12	2.5943e+07	25.943	11.6867
	4	2.5e-05	160000	15.2194	0.22829	1.77677e-12	1.51064e+07	15.1064	7.59729
	10	2.5e-05	400000	11.6501	0.174752	1.77677e-12	4.92059e+07	49.2059	15.7864
	6	2.5e-05	240000	10.9721	0.164581	1.77677e-12	3.13914e+07	31.3914	12.9275
	4	2.5e-05	160000	16.7932	0.251899	1.77677e-12	1.36921e+07	13.6921	6.88602
	6	2.5e-05	240000	13.3727	0.200591	1.77677e-12	2.57673e+07	25.7673	10.6114
	7	2.5e-05	280000	6.04624	0.0906936	1.77677e-12	6.62803e+07	66.2803	25.307
	7	2.5e-05	280000	13.5102	0.202653	1.77677e-12	2.97469e+07	29.7469	11.3579
	4	2.5e-05	160000	13.3456	0.200184	1.77677e-12	1.72245e+07	17.2245	8.66255
	7	2.5e-05	280000	7.36586	0.110488	1.77677e-12	5.44559e+07	54.4559	20.7922
	8	2.5e-05	320000	14.3779	0.215668	1.77677e-12	3.19393e+07	31.9393	11.4237
	4	2.5e-05	160000	13.1986	0.197979	1.77677e-12	1.74162e+07	17.4162	8.75891
	3	2.5e-05	120000	14.4349	0.216523	1.77677e-12	1.19484e+07	11.9484	6.92866
	5	2.5e-05	200000	13.5224	0.202836	1.77677e-12	2.12426e+07	21.2426	9.56924
	4	2.5e-05	160000	13.8543	0.207814	1.77677e-12	1.6593e+07	16.593	8.34491
	5	2.5e-05	200000	13.6763	0.205145	1.77677e-12	2.10039e+07	21.0039	9.46172
	8	2.5e-05	320000	17.847	0.267704	1.77677e-12	2.57433e+07	25.7433	9.20759
	7	2.5e-05	280000	5.76262	0.0864393	1.77677e-12	6.95249e+07	69.5249	26.5458
	7	2.5e-05	280000	12.6374	0.189561	1.77677e-12	3.17962e+07	31.7962	12.1403
	7	2.5e-05	280000	16.881	0.253215	1.77677e-12	2.38179e+07	23.8179	9.09408
FCT-5	NS	Area	RhoS	U(ppm)	σU (ppm)	𝝍-parameter	Age	Age (Ma)	Err Age (Ma)
	6	2.5e-05	240000	15.8039	0.237059	1.77677e-12	2.18101e+07	21.8101	8.9818
	6	2.5e-05	240000	17.3127	0.25969	1.77677e-12	1.99124e+07	19.9124	8.20026
	4	2.5e-05	160000	7.76009	0.116401	1.77677e-12	2.95939e+07	29.5939	14.8833
	8	2.5e-05	320000	12.6646	0.189969	1.77677e-12	3.62479e+07	36.2479	12.9648
	3	2.5e-05	120000	8.70895	0.130634	1.77677e-12	1.97922e+07	19.7922	11.4771
	4	2.5e-05	160000	12.7928	0.191892	1.77677e-12	1.79678e+07	17.9678	9.03634
	7	2.5e-05	280000	10.4865	0.157298	1.77677e-12	3.82985e+07	38.2985	14.623
	4	2.5e-05	160000	11.487	0.172306	1.77677e-12	2.00071e+07	20.0071	10.0619
	6	2.5e-05	240000	10.3433	0.155149	1.77677e-12	3.32949e+07	33.2949	13.7114
	7	2.5e-05	280000	18.4197	0.276295	1.77677e-12	2.18317e+07	21.8317	8.3357
	4	2.5e-05	160000	12.5174	0.187761	1.77677e-12	1.83626e+07	18.3626	9.2349
	7	2.5e-05	280000	19.4612	0.291918	1.77677e-12	2.06651e+07	20.6651	7.8903
	8	2.5e-05	320000	15.014	0.22521	1.77677e-12	3.05893e+07	30.5893	10.9409
	5	2.5e-05	200000	13.254	0.19881	1.77677e-12	2.1672e+07	21.672	9.7627
	9	2.5e-05	360000	15.4786	0.232179	1.77677e-12	3.33729e+07	33.3729	11.2699
	10	2.5e-05	400000	18.3549	0.275324	1.77677e-12	3.12752e+07	31.2752	10.0338
	6	2.5e-05	240000	15.8848	0.238272	1.77677e-12	2.16992e+07	21.6992	8.93613
	6	2.5e-05	240000	35.278	0.52917	1.77677e-12	9.77968e+06	9.77968	4.02744
	9	2.5e-05	360000	19.9198	0.298797	1.77677e-12	2.59471e+07	25.9471	8.76223
	8	2.5e-05	320000	14.8213	0.222319	1.77677e-12	3.0986e+07	30.986	11.0827
	4	2.5e-05	160000	16.8477	0.252715	1.77677e-12	1.36479e+07	13.6479	6.8638
	8	2.5e-05	320000	17.5462	0.263192	1.77677e-12	2.61838e+07	26.1838	9.36512
	6	2.5e-05	240000	14.7829	0.221744	1.77677e-12	2.33137e+07	23.3137	9.60101
	8	2.5e-05	320000	15.1259	0.226889	1.77677e-12	3.03634e+07	30.3634	10.8601
	5	2.5e-05	200000	14.4522	0.216783	1.77677e-12	1.9878e+07	19.878	8.95452
	8	2.5e-05	320000	12.433	0.186494	1.77677e-12	3.69213e+07	36.9213	13.2056
	6	2.5e-05	240000	15.1328	0.226992	1.77677e-12	2.27756e+07	22.7756	9.3794
	9	2.5e-05	360000	13.9133	0.208699	1.77677e-12	3.71166e+07	37.1166	12.5341
	6	2.5e-05	240000	15.6132	0.234199	1.77677e-12	2.2076e+07	22.076	9.09129
Lim-1	NS	Area	RhoS	U(ppm)	σU (ppm)	𝝍-parameter	Age	Age (Ma)	Err Age (Ma)
	12	2.5e-05	480000	19.753	0.296295	1.77677e-12	3.33971e+07	33.3971	9.80876
	1	2.5e-05	40000	6.59026	0.0988538	1.77677e-12	8.358e+06	8.358	8.37023
	10	2.5e-05	400000	29.2011	0.438017	1.77677e-12	1.88474e+07	18.8474	6.04668
	5	2.5e-05	200000	21.7223	0.325834	1.77677e-12	1.26743e+07	12.6743	5.70945
	4	2.5e-05	160000	14.7131	0.220696	1.77677e-12	1.49671e+07	14.9671	7.52725
	5	2.5e-05	200000	8.15004	0.122251	1.77677e-12	3.37256e+07	33.7256	15.1925
	7	2.5e-05	280000	11.7546	0.176319	1.77677e-12	3.27395e+07	32.7395	12.5005
	5	2.5e-05	200000	12.0243	0.180365	1.77677e-12	2.28784e+07	22.8784	10.3061
	6	2.5e-05	240000	19.0903	0.286354	1.77677e-12	1.72998e+07	17.2998	7.12438
	3	2.5e-05	120000	7.03931	0.10559	1.77677e-12	2.3447e+07	23.447	13.5964
	4	2.5e-05	160000	11.0385	0.165578	1.77677e-12	1.99418e+07	19.9418	10.0291
	8	2.5e-05	320000	14.9676	0.224514	1.77677e-12	2.93924e+07	29.3924	10.5127
	3	2.5e-05	120000	14.9451	0.224177	1.77677e-12	1.10544e+07	11.0544	6.41023
	4	2.5e-05	160000	13.8214	0.207321	1.77677e-12	1.59315e+07	15.9315	8.01225
	5	2.5e-05	200000	13.096	0.19644	1.77677e-12	2.10092e+07	21.0092	9.46413
	1	2.5e-05	40000	2.4849	0.0372735	1.77677e-12	2.21427e+07	22.1427	22.1751
	3	2.5e-05	120000	10.9478	0.164217	1.77677e-12	1.5086e+07	15.086	8.74805
	3	2.5e-05	120000	7.10357	0.106554	1.77677e-12	2.32353e+07	23.2353	13.4737
	2	2.5e-05	80000	10.6428	0.159643	1.77677e-12	1.03493e+07	10.3493	7.33943
	2	2.5e-05	80000	15.075	0.226124	1.77677e-12	7.30826e+06	7.30826	5.18283
	1	2.5e-05	40000	5.14165	0.0771248	1.77677e-12	1.07108e+07	10.7108	10.7265
	2	2.5e-05	80000	5.80681	0.0871021	1.77677e-12	1.89557e+07	18.9557	13.4429
	8	2.5e-05	320000	16.6882	0.250323	1.77677e-12	2.63681e+07	26.3681	9.43106
	4	2.5e-05	160000	14.734	0.22101	1.77677e-12	1.49459e+07	14.9459	7.51658
	6	2.5e-05	240000	21.8073	0.327109	1.77677e-12	1.5147e+07	15.147	6.23778
	3	2.5e-05	120000	17.7271	0.265906	1.77677e-12	9.32086e+06	9.32086	5.40498
	1	2.5e-05	40000	7.83773	0.117566	1.77677e-12	7.02845e+06	7.02845	7.03873
	1	2.5e-05	40000	8.87996	0.133199	1.77677e-12	6.20392e+06	6.20392	6.213
Lim-2	NS	Area	RhoS	U(ppm)	σU (ppm)	𝝍-parameter	Age	Age (Ma)	Err Age (Ma)
	8	2.5e-05	320000	32.5418	0.488126	1.77677e-12	1.35357e+07	13.5357	4.84128
	5	2.5e-05	200000	10.4548	0.156822	1.77677e-12	2.63059e+07	26.3059	11.8501
	3	2.5e-05	120000	5.93949	0.0890924	1.77677e-12	2.77794e+07	27.7794	16.1087
	5	2.5e-05	200000	32.0264	0.480396	1.77677e-12	8.59922e+06	8.59922	3.87373
	5	2.5e-05	200000	18.3182	0.274774	1.77677e-12	1.50268e+07	15.0268	6.76918
	3	2.5e-05	120000	8.03558	0.120534	1.77677e-12	2.05446e+07	20.5446	11.9134
	7	2.5e-05	280000	16.1124	0.241686	1.77677e-12	2.39011e+07	23.9011	9.12585
	4	2.5e-05	160000	28.4455	0.426683	1.77677e-12	7.74589e+06	7.74589	3.89555
	6	2.5e-05	240000	11.3681	0.170522	1.77677e-12	2.90248e+07	29.0248	11.9529
	2	2.5e-05	80000	5.20905	0.0781358	1.77677e-12	2.11274e+07	21.1274	14.983
	2	2.5e-05	80000	7.11476	0.106721	1.77677e-12	1.54752e+07	15.4752	10.9746
	2	2.5e-05	80000	9.17216	0.137582	1.77677e-12	1.20072e+07	12.0072	8.51515
	7	2.5e-05	280000	27.7786	0.416679	1.77677e-12	1.38742e+07	13.8742	5.29739
	11	2.5e-05	440000	20.0251	0.300376	1.77677e-12	3.02055e+07	30.2055	9.25277
	2	2.5e-05	80000	7.26632	0.108995	1.77677e-12	1.51528e+07	15.1528	10.7459
	4	2.5e-05	160000	15.8158	0.237237	1.77677e-12	1.39247e+07	13.9247	7.003
	2	2.5e-05	80000	4.53498	0.0680247	1.77677e-12	2.42618e+07	24.2618	17.2059
	4	2.5e-05	160000	7.57311	0.113597	1.77677e-12	2.90465e+07	29.0465	14.608
	4	2.5e-05	160000	13.2398	0.198598	1.77677e-12	1.66304e+07	16.6304	8.36375
	4	2.5e-05	160000	14.5872	0.218808	1.77677e-12	1.50961e+07	15.0961	7.59211
	4	2.5e-05	160000	11.0593	0.16589	1.77677e-12	1.99043e+07	19.9043	10.0102
	4	2.5e-05	160000	7.77512	0.116627	1.77677e-12	2.82934e+07	28.2934	14.2293
	1	2.5e-05	40000	4.76671	0.0715006	1.77677e-12	1.15526e+07	11.5526	11.5695
	4	2.5e-05	160000	13.5587	0.203381	1.77677e-12	1.62398e+07	16.2398	8.16731
	4	2.5e-05	160000	10.4928	0.157393	1.77677e-12	2.09771e+07	20.9771	10.5498
	3	2.5e-05	120000	8.71084	0.130663	1.77677e-12	1.89543e+07	18.9543	10.9912
	2	2.5e-05	80000	10.1509	0.152264	1.77677e-12	1.08504e+07	10.8504	7.69482
	4	2.5e-05	160000	10.759	0.161385	1.77677e-12	2.0459e+07	20.459	10.2892
Lim-3	NS	Area	RhoS	U(ppm)	σU (ppm)	𝝍-parameter	Age	Age (Ma)	Err Age (Ma)
	5	2.5e-05	200000	10.2656	0.153984	1.77677e-12	2.67899e+07	26.7899	12.0681
	3	2.5e-05	120000	12.5609	0.188413	1.77677e-12	1.31506e+07	13.1506	7.62576
	2	2.5e-05	80000	4.70963	0.0706444	1.77677e-12	2.33638e+07	23.3638	16.569
	6	2.5e-05	240000	10.5297	0.157945	1.77677e-12	3.13304e+07	31.3304	12.9024
	5	2.5e-05	200000	9.43764	0.141565	1.77677e-12	2.91348e+07	29.1348	13.1245
	9	2.5e-05	360000	33.3693	0.500539	1.77677e-12	1.48485e+07	14.8485	5.01426
	7	2.5e-05	280000	15.2917	0.229375	1.77677e-12	2.51814e+07	25.1814	9.6147
	10	2.5e-05	400000	17.0783	0.256174	1.77677e-12	3.21927e+07	32.1927	10.3281
	2	2.5e-05	80000	5.43951	0.0815927	1.77677e-12	2.02337e+07	20.2337	14.3492
	3	2.5e-05	120000	5.7694	0.0865411	1.77677e-12	2.85965e+07	28.5965	16.5825
	1	2.5e-05	40000	9.23982	0.138597	1.77677e-12	5.96241e+06	5.96241	5.97113
	2	2.5e-05	80000	7.18883	0.107832	1.77677e-12	1.53159e+07	15.3159	10.8616
	3	2.5e-05	120000	10.6854	0.160281	1.77677e-12	1.54559e+07	15.4559	8.96259
	4	2.5e-05	160000	8.3605	0.125407	1.77677e-12	2.63165e+07	26.3165	13.235
	4	2.5e-05	160000	13.1316	0.196974	1.77677e-12	1.67673e+07	16.7673	8.4326
	5	2.5e-05	200000	14.5528	0.218291	1.77677e-12	1.89092e+07	18.9092	8.51812
	3	2.5e-05	120000	11.1279	0.166918	1.77677e-12	1.48421e+07	14.8421	8.60665
	4	2.5e-05	160000	38.5901	0.578851	1.77677e-12	5.71055e+06	5.71055	2.87194
	4	2.5e-05	160000	12.3128	0.184692	1.77677e-12	1.78809e+07	17.8809	8.99261
	7	2.5e-05	280000	17.7992	0.266989	1.77677e-12	2.16398e+07	21.6398	8.26245
	5	2.5e-05	200000	12.2765	0.184147	1.77677e-12	2.24093e+07	22.4093	10.0948
	7	2.5e-05	280000	38.6636	0.579954	1.77677e-12	9.97117e+06	9.97117	3.80716
	6	2.5e-05	240000	17.0125	0.255188	1.77677e-12	1.94095e+07	19.4095	7.99318
	15	2.5e-05	600000	26.8216	0.402324	1.77677e-12	3.07508e+07	30.7508	8.11225
	6	2.5e-05	240000	13.0536	0.195805	1.77677e-12	2.52845e+07	25.2845	10.4126
	26	2.5e-05	1040000	91.0687	1.36603	1.77677e-12	1.57167e+07	15.7167	3.19743
MT	NS	Area	RhoS	U(ppm)	σU (ppm)	𝝍-parameter	Age	Age (Ma)	Err Age (Ma)
	13	2.5e-05	520000	2.67603	0.0401405	1.77677e-12	2.91534e+08	291.534	82.3811
	8	2.5e-05	320000	2.3962	0.0359431	1.77677e-12	2.01765e+08	201.765	72.1652
	6	2.5e-05	240000	2.52024	0.0378036	1.77677e-12	1.4452e+08	144.52	59.5157
	9	2.5e-05	360000	2.28219	0.0342328	1.77677e-12	2.3766e+08	237.66	80.2566
	14	2.5e-05	560000	2.24343	0.0336514	1.77677e-12	3.72148e+08	372.148	101.478
	10	2.5e-05	400000	2.41537	0.0362306	1.77677e-12	2.4928e+08	249.28	79.9746
	11	2.5e-05	440000	2.31122	0.0346683	1.77677e-12	2.85749e+08	285.749	87.5327
	10	2.5e-05	400000	2.28754	0.0343131	1.77677e-12	2.6293e+08	262.93	84.3537
	12	2.5e-05	480000	2.49537	0.0374305	1.77677e-12	2.88657e+08	288.657	84.7788
	10	2.5e-05	400000	2.41204	0.0361806	1.77677e-12	2.49618e+08	249.618	80.083
	7	2.5e-05	280000	2.57959	0.0386939	1.77677e-12	1.64471e+08	164.471	62.7979
	10	2.5e-05	400000	2.44262	0.0366393	1.77677e-12	2.46551e+08	246.551	79.0993
	16	2.5e-05	640000	2.63931	0.0395897	1.77677e-12	3.61809e+08	361.809	92.5461
	11	2.5e-05	440000	2.40664	0.0360997	1.77677e-12	2.74657e+08	274.657	84.1349
	16	2.5e-05	640000	2.46901	0.0370351	1.77677e-12	3.86033e+08	386.033	98.7422
	11	2.5e-05	440000	2.39705	0.0359558	1.77677e-12	2.75733e+08	275.733	84.4645
	9	2.5e-05	360000	2.16803	0.0325204	1.77677e-12	2.49935e+08	249.935	84.4018
	12	2.5e-05	480000	2.52	0.0377999	1.77677e-12	2.85897e+08	285.897	83.9684
	10	2.5e-05	400000	2.41614	0.036242	1.77677e-12	2.49202e+08	249.202	79.9497
	12	2.5e-05	480000	2.05462	0.0308192	1.77677e-12	3.4893e+08	348.93	102.481
	7	2.5e-05	280000	2.54562	0.0381843	1.77677e-12	1.66638e+08	166.638	63.6253
	8	2.5e-05	320000	2.47294	0.0370942	1.77677e-12	1.95598e+08	195.598	69.9594
	13	2.5e-05	520000	2.37074	0.0355612	1.77677e-12	3.28136e+08	328.136	92.7238
	6	2.5e-05	240000	2.47456	0.0371185	1.77677e-12	1.47157e+08	147.157	60.6018
	12	2.5e-05	480000	2.34502	0.0351753	1.77677e-12	3.0673e+08	306.73	90.087
	12	2.5e-05	480000	2.42869	0.0364303	1.77677e-12	2.96403e+08	296.403	87.0538
	8	2.5e-05	320000	1.98833	0.0298249	1.77677e-12	2.42386e+08	242.386	86.6938
	9	2.5e-05	360000	2.42285	0.0363427	1.77677e-12	2.24099e+08	224.099	75.6773
	10	2.5e-05	400000	2.50917	0.0376375	1.77677e-12	2.40133e+08	240.133	77.04
	7	2.5e-05	280000	2.33073	0.034961	1.77677e-12	1.81787e+08	181.787	69.4093
	4	2.5e-05	160000	2.46511	0.0369767	1.77677e-12	9.88516e+07	98.8516	49.7143
	9	2.5e-05	360000	2.65297	0.0397945	1.77677e-12	2.04966e+08	204.966	69.2162
