# Supplementary material
Source: Research Square preprint supplement (doi:10.21203/rs.3.rs-9545186/v1)
Supplement: Supplementary file 3 [file b592ec3ca981867b8f76901f.xlsx]

## Sheet: Moderate annealing
HM-14	NS	Area	RhoS	U(ppm)	σU (ppm)	ζICP-METHOD	ζICP-METHOD (Ma)	σ Age (Ma)-ζICP	𝝍-parameter	𝝍-Age	𝝍-Age(Ma)	σ Age (Ma) 𝝍
	33	9e-06	3.66667e+06	90.7673	1.36151	7.31851e+07	73.1851	14.7651	1.77677e-12	7.24482e+07	72.4482	13.151
	26	9e-06	2.88889e+06	30.6276	0.459414	1.69606e+08	169.606	37.4908	1.77677e-12	1.67911e+08	167.911	34.0444
	14	9e-06	1.55556e+06	59.7789	0.896684	4.72382e+07	47.2382	13.5128	1.77677e-12	4.67616e+07	46.7616	12.7271
	12	9e-06	1.33333e+06	44.3401	0.665101	5.45571e+07	54.5571	16.7032	1.77677e-12	5.4007e+07	54.007	15.8362
	23	9e-06	2.55556e+06	58.1436	0.872154	7.95881e+07	79.5881	18.4737	1.77677e-12	7.87871e+07	78.7871	16.921
	18	9e-06	2000000	35.8984	0.538477	1.00718e+08	100.718	25.8661	1.77677e-12	9.97057e+07	99.7057	24.0543
	21	9e-06	2.33333e+06	306.27	4.59406	1.38661e+07	13.8661	3.33994	1.77677e-12	1.37258e+07	13.7258	3.07735
	46	9e-06	5.11111e+06	43.4015	0.651023	2.11071e+08	211.071	37.8396	1.77677e-12	2.08968e+08	208.968	32.6328
	20	9e-06	2.22222e+06	87.0588	1.30588	4.63405e+07	46.3405	11.3888	1.77677e-12	4.5873e+07	45.873	10.5256
	12	9e-06	1.33333e+06	42.8418	0.642627	5.64568e+07	56.4568	17.2848	1.77677e-12	5.58876e+07	55.8876	16.3876
	8	9e-06	888889	13.4475	0.201712	1.19324e+08	119.324	43.9074	1.77677e-12	1.18127e+08	118.127	42.2042
	30	4e-06	7500000	199.488	2.99231	6.81391e+07	68.1391	14.2496	1.77677e-12	6.74528e+07	67.4528	12.7948
	20	9e-06	2.22222e+06	40.5234	0.607851	9.91485e+07	99.1485	24.3671	1.77677e-12	9.81522e+07	98.1522	22.521
	17	9e-06	1.88889e+06	55.7949	0.836923	6.13891e+07	61.3891	16.1517	1.77677e-12	6.07704e+07	60.7704	15.067
	125	9e-06	1.38889e+07	214.485	3.21727	1.16916e+08	116.916	15.8593	1.77677e-12	1.15743e+08	115.743	11.943
	25	4e-06	6250000	172.224	2.58337	6.57834e+07	65.7834	14.7683	1.77677e-12	6.51206e+07	65.1206	13.4482
	18	9e-06	2000000	46.5622	0.698433	7.77896e+07	77.7896	19.9778	1.77677e-12	7.70066e+07	77.0066	18.5781
	16	9e-06	1.77778e+06	53.93	0.80895	5.97833e+07	59.7833	16.1415	1.77677e-12	5.91807e+07	59.1807	15.1053
	39	9e-06	4.33333e+06	59.201	0.888014	1.32004e+08	132.004	25.0603	1.77677e-12	1.30681e+08	130.681	21.9794
	25	9e-06	2.77778e+06	57.7992	0.866987	8.69744e+07	86.9744	19.5257	1.77677e-12	8.60996e+07	86.0996	17.7806
	50	9e-06	5.55556e+06	55.8375	0.837563	1.78778e+08	178.778	31.171	1.77677e-12	1.76992e+08	176.992	26.6356
	57	9e-06	6.33333e+06	41.9566	0.629349	2.69325e+08	269.325	45.0215	1.77677e-12	2.66654e+08	266.654	37.8903
	65	9e-06	7.22222e+06	93.9669	1.4095	1.38538e+08	138.538	22.2459	1.77677e-12	1.3715e+08	137.15	18.4169
	17	9e-06	1.88889e+06	44.9379	0.674069	7.61333e+07	76.1333	20.031	1.77677e-12	7.53669e+07	75.3669	18.686
	34	9e-06	3.77778e+06	43.2828	0.649242	1.57097e+08	157.097	31.3453	1.77677e-12	1.55525e+08	155.525	27.8468
	4	9e-06	444444	7.25928	0.108889	1.10597e+08	110.597	56.4367	1.77677e-12	1.09486e+08	109.486	55.0321
	21	9e-06	2.33333e+06	36.2943	0.544414	1.16084e+08	116.084	27.9612	1.77677e-12	1.14919e+08	114.919	25.7649
	42	9e-06	4.66667e+06	136.951	2.05427	6.17882e+07	61.7882	11.4282	1.77677e-12	6.11655e+07	61.1655	9.94891
	48	9e-06	5.33333e+06	131.656	1.97484	7.3389e+07	73.389	12.97	1.77677e-12	7.26501e+07	72.6501	11.1325
	9	9e-06	1000000	43.59	0.65385	4.16636e+07	41.6636	14.5233	1.77677e-12	4.12431e+07	41.2431	13.9105
	56	9e-06	6.22222e+06	85.9066	1.2886	1.30635e+08	130.635	21.9596	1.77677e-12	1.29325e+08	129.325	18.5186
	11	9e-06	1.22222e+06	64.7242	0.970862	3.43143e+07	34.3143	10.9219	1.77677e-12	3.39678e+07	33.9678	10.3897
	32	9e-06	3.55556e+06	44.0369	0.660554	1.45455e+08	145.455	29.685	1.77677e-12	1.43999e+08	143.999	26.512
	52	9e-06	5.77778e+06	78.813	1.18219	1.32206e+08	132.206	22.7574	1.77677e-12	1.30881e+08	130.881	19.3589
	38	9e-06	4.22222e+06	69.3484	1.04023	1.09987e+08	109.987	21.0751	1.77677e-12	1.08883e+08	108.883	18.5303
	16	9e-06	1.77778e+06	46.7445	0.701167	6.89242e+07	68.9242	18.6095	1.77677e-12	6.823e+07	68.23	17.415
	5	9e-06	555556	24.248	0.36372	4.161e+07	41.61	19.0863	1.77677e-12	4.119e+07	41.19	18.5423
	27	9e-06	3000000	13.681	0.205216	3.87639e+08	387.639	84.4279	1.77677e-12	3.83829e+08	383.829	76.4622
	28	9e-06	3.11111e+06	139.692	2.09538	4.04509e+07	40.4509	8.68652	1.77677e-12	4.00426e+07	40.0426	7.84279
	16	9e-06	1.77778e+06	26.2819	0.394229	1.22082e+08	122.082	32.962	1.77677e-12	1.20857e+08	120.857	30.8475
HM-3	NS	Area	RhoS	U(ppm)	σU (ppm)	ζICP-METHOD	ζICP-METHOD (Ma)	σ Age (Ma)-ζICP	𝝍-parameter	𝝍-Age	𝝍-Age(Ma)	σ Age (Ma) 𝝍
	52	9e-06	5.77778e+06	92.7267	1.3909	1.1254e+08	112.54	19.3722	1.77677e-12	1.07017e+08	107.017	15.93
	28	9e-06	3.11111e+06	102.702	1.54052	5.49585e+07	54.9585	11.8019	1.77677e-12	5.22495e+07	52.2495	10.2709
	32	9e-06	3.55556e+06	104.59	1.56886	6.16433e+07	61.6433	12.5804	1.77677e-12	5.86063e+07	58.6063	10.8346
	25	9e-06	2.77778e+06	112.182	1.68273	4.4958e+07	44.958	10.093	1.77677e-12	4.27404e+07	42.7404	8.85531
	23	9e-06	2.55556e+06	50.0159	0.750239	9.2429e+07	92.429	21.4543	1.77677e-12	8.78856e+07	87.8856	18.9322
	38	9e-06	4.22222e+06	154.719	2.32079	4.95309e+07	49.5309	9.49079	1.77677e-12	4.70885e+07	47.0885	8.05239
	19	9e-06	2.11111e+06	42.0173	0.630259	9.09004e+07	90.9004	22.8215	1.77677e-12	8.64317e+07	86.4317	20.3727
	85	9e-06	9.44444e+06	125.877	1.88816	1.35273e+08	135.273	20.1393	1.77677e-12	1.28645e+08	128.645	15.593
	44	9e-06	4.88889e+06	107.089	1.60634	8.26469e+07	82.6469	15.0425	1.77677e-12	7.85815e+07	78.5815	12.5864
	38	9e-06	4.22222e+06	170.308	2.55461	4.5013e+07	45.013	8.62511	1.77677e-12	4.27927e+07	42.7927	7.31778
	13	9e-06	1.44444e+06	39.9723	0.599584	6.55061e+07	65.5061	19.3574	1.77677e-12	6.22798e+07	62.2798	17.5989
	45	9e-06	5000000	108.52	1.6278	8.34058e+07	83.4058	15.0644	1.77677e-12	7.93033e+07	79.3033	12.5763
	11	9e-06	1.22222e+06	83.9364	1.25905	2.64762e+07	26.4762	8.42714	1.77677e-12	2.51684e+07	25.1684	7.70977
	44	9e-06	4.88889e+06	114.998	1.72497	7.69967e+07	76.9967	14.0141	1.77677e-12	7.32076e+07	73.2076	11.7256
	15	9e-06	1.66667e+06	83.1781	1.24767	3.6405e+07	36.405	10.1064	1.77677e-12	3.46081e+07	34.6081	9.12985
	22	9e-06	2.44444e+06	120.27	1.80405	3.69256e+07	36.9256	8.72684	1.77677e-12	3.51031e+07	35.1031	7.72121
	12	9e-06	1.33333e+06	38.3288	0.574932	6.30718e+07	63.0718	19.31	1.77677e-12	5.99648e+07	59.9648	17.6117
	13	9e-06	1.44444e+06	42.6509	0.639763	6.14117e+07	61.4117	18.1475	1.77677e-12	5.83861e+07	58.3861	16.4986
	24	9e-06	2.66667e+06	91.2016	1.36802	5.3055e+07	53.055	12.1061	1.77677e-12	5.04395e+07	50.4395	10.6514
	10	9e-06	1.11111e+06	58.2656	0.873984	3.46518e+07	34.6518	11.5136	1.77677e-12	3.29412e+07	32.9412	10.5683
	8	9e-06	888889	22.616	0.33924	7.12163e+07	71.2163	26.2053	1.77677e-12	6.77102e+07	67.7102	24.2178
	14	9e-06	1.55556e+06	38.3591	0.575387	7.34663e+07	73.4663	21.0156	1.77677e-12	6.98501e+07	69.8501	19.0469
	16	9e-06	1.77778e+06	57.3651	0.860476	5.6219e+07	56.219	15.1791	1.77677e-12	5.34482e+07	53.4482	13.6714
	31	9e-06	3.44444e+06	70.0948	1.05142	8.89167e+07	88.9167	18.3647	1.77677e-12	8.45449e+07	84.5449	15.8587
	75	9e-06	8.33333e+06	277.484	4.16226	5.4487e+07	54.487	8.39406	1.77677e-12	5.18012e+07	51.8012	6.6055
	52	9e-06	5.77778e+06	134.352	2.01528	7.78822e+07	77.8822	13.4063	1.77677e-12	7.40498e+07	74.0498	11.0227
	33	9e-06	3.66667e+06	111.24	1.6686	5.97784e+07	59.7784	12.0603	1.77677e-12	5.6833e+07	56.833	10.3602
	10	9e-06	1.11111e+06	34.464	0.516959	5.84749e+07	58.4749	19.4292	1.77677e-12	5.55934e+07	55.5934	17.8356
	21	9e-06	2.33333e+06	61.8782	0.928173	6.83413e+07	68.3413	16.4615	1.77677e-12	6.4976e+07	64.976	14.6082
	11	9e-06	1.22222e+06	42.11	0.63165	5.2667e+07	52.667	16.7634	1.77677e-12	5.00705e+07	50.0705	15.338
	10	9e-06	1.11111e+06	22.6818	0.340228	8.86418e+07	88.6418	29.4526	1.77677e-12	8.42834e+07	84.2834	27.04
	28	9e-06	3.11111e+06	45.2558	0.678836	1.24052e+08	124.052	26.6393	1.77677e-12	1.17969e+08	117.969	23.1896
	902	0.000279	3.13194e+06	86.2953		6.63836e+07		15.6428		6.1622e+07	61.622	3.77655
	104282							6.57896e+07	65.7896	6.62178
L-1	NS	Area	RhoS	U(ppm)	σU (ppm)	ζICP-METHOD	ζICP-METHOD (Ma)	σ Age (Ma)-ζICP	𝝍-parameter	𝝍-Age	𝝍-Age(Ma)	σ Age (Ma) 𝝍
	13	9e-06	1.44444e+06	26.9317	0.403975	9.69872e+07	96.9872	28.6602	1.77677e-12	9.06554e+07	90.6554	25.6172
	12	9e-06	1.33333e+06	21.0926	0.316389	1.14158e+08	114.158	34.9505	1.77677e-12	1.06714e+08	106.714	31.3421
	13	4e-06	3250000	62.859	0.942885	9.35212e+07	93.5212	27.636	1.77677e-12	8.74141e+07	87.4141	24.7013
	30	9e-06	3.33333e+06	105.737	1.58605	5.71838e+07	57.1838	11.9586	1.77677e-12	5.34398e+07	53.4398	10.1761
	14	9e-06	1.55556e+06	80.1379	1.20207	3.52702e+07	35.2702	10.0893	1.77677e-12	3.29572e+07	32.9572	8.98685
	32	4e-06	8000000	144.571	2.16857	1.00042e+08	100.042	20.4169	1.77677e-12	9.35121e+07	93.5121	17.2876
	48	9e-06	5.33333e+06	98.6792	1.48019	9.77294e+07	97.7294	17.2717	1.77677e-12	9.13494e+07	91.3494	14.081
	25	9e-06	2.77778e+06	62.5208	0.937812	8.04468e+07	80.4468	18.0603	1.77677e-12	7.51885e+07	75.1885	15.5782
	39	9e-06	4.33333e+06	100.174	1.50261	7.83382e+07	78.3382	14.8721	1.77677e-12	7.32169e+07	73.2169	12.3752
	36	9e-06	4000000	66.5431	0.998146	1.08603e+08	108.603	21.2201	1.77677e-12	1.01519e+08	101.519	17.7889
	17	4e-06	4250000	87.0822	1.30623	8.8314e+07	88.314	23.2357	1.77677e-12	8.25448e+07	82.5448	20.5121
	12	4e-06	3000000	69.2455	1.03868	7.84571e+07	78.4571	24.0204	1.77677e-12	7.33281e+07	73.3281	21.5366
	17	9e-06	1.88889e+06	45.335	0.680024	7.54704e+07	75.4704	19.8565	1.77677e-12	7.05356e+07	70.5356	17.5279
	9	9e-06	1000000	28.9543	0.434314	6.26216e+07	62.6216	21.8289	1.77677e-12	5.85232e+07	58.5232	19.763
	27	4e-06	6750000	108.671	1.63007	1.1219e+08	112.19	24.435	1.77677e-12	1.04873e+08	104.873	20.9653
	14	9e-06	1.55556e+06	32.8482	0.492724	8.571e+07	85.71	24.5179	1.77677e-12	8.01098e+07	80.1098	21.8445
	13	9e-06	1.44444e+06	34.5528	0.518292	7.57203e+07	75.7203	22.3757	1.77677e-12	7.07693e+07	70.7693	19.9978
	14	9e-06	1.55556e+06	37.9421	0.569131	7.42692e+07	74.2692	21.2452	1.77677e-12	6.94125e+07	69.4125	18.9276
	55	9e-06	6.11111e+06	102.227	1.5334	1.08009e+08	108.009	18.2602	1.77677e-12	1.00964e+08	100.964	14.6689
	8	9e-06	888889	12.304	0.18456	1.30302e+08	130.302	47.947	1.77677e-12	1.21816e+08	121.816	43.5698
	45	9e-06	5000000	95.5346	1.43302	9.46597e+07	94.6597	17.0971	1.77677e-12	8.84787e+07	88.4787	14.0314
	61	9e-06	6.77778e+06	140.056	2.10084	8.75753e+07	87.5753	14.3349	1.77677e-12	8.1854e+07	81.854	11.3776
	16	4e-06	4000000	81.7517	1.22628	8.85372e+07	88.5372	23.905	1.77677e-12	8.27535e+07	82.7535	21.1673
	45	9e-06	5000000	90.4069	1.3561	9.99872e+07	99.9872	18.0593	1.77677e-12	9.34609e+07	93.4609	14.8215
	23	9e-06	2.55556e+06	45.439	0.681586	1.01666e+08	101.666	23.5984	1.77677e-12	9.50309e+07	95.0309	20.4715
	23	9e-06	2.55556e+06	49.0148	0.735222	9.43031e+07	94.3031	21.8893	1.77677e-12	8.81453e+07	88.1453	18.9882
	62	9e-06	6.88889e+06	239.561	3.59342	5.21821e+07	52.1821	8.49928	1.77677e-12	4.87643e+07	48.7643	6.73162
	36	9e-06	4000000	80.7394	1.21109	8.96396e+07	89.6396	17.5148	1.77677e-12	8.37843e+07	83.7843	14.6814
	48	9e-06	5.33333e+06	106.226	1.59339	9.0835e+07	90.835	16.0532	1.77677e-12	8.49022e+07	84.9022	13.0872
	52	9e-06	5.77778e+06	84.0337	1.26051	1.24071e+08	124.071	21.357	1.77677e-12	1.15987e+08	115.987	17.2652
	6	4e-06	1500000	42.6263	0.639395	6.37986e+07	63.7986	26.846	1.77677e-12	5.96235e+07	59.6235	24.554
	23	9e-06	2.55556e+06	19.4934	0.292402	2.34542e+08	234.542	54.4412	1.77677e-12	2.19381e+08	219.381	47.2589
	15	9e-06	1.66667e+06	33.43	0.50145	9.02025e+07	90.2025	25.041	1.77677e-12	8.43107e+07	84.3107	22.2417
	43	9e-06	4.77778e+06	100.945	1.51418	8.56641e+07	85.6641	15.7155	1.77677e-12	8.00669e+07	80.0669	12.9557
	38	9e-06	4.22222e+06	69.9155	1.04873	1.09103e+08	109.103	20.9056	1.77677e-12	1.01986e+08	101.986	17.4402
	15	9e-06	1.66667e+06	26.6045	0.399068	1.13142e+08	113.142	31.4093	1.77677e-12	1.05764e+08	105.764	27.9013
	27	9e-06	3000000	52.129	0.781935	1.04012e+08	104.012	22.6538	1.77677e-12	9.72246e+07	97.2246	19.4362
	47	9e-06	5.22222e+06	67.2787	1.00918	1.39896e+08	139.896	24.8986	1.77677e-12	1.30791e+08	130.791	20.3479
	20	9e-06	2.22222e+06	28.1847	0.42277	1.42078e+08	142.078	34.9177	1.77677e-12	1.32833e+08	132.833	30.5594
L-121	NS	Area	RhoS	U(ppm)	σU (ppm)	ζICP-METHOD	ζICP-METHOD (Ma)	σ Age (Ma)-ζICP	𝝍-parameter	𝝍-Age	𝝍-Age(Ma)	σ Age (Ma) 𝝍
	55	9e-06	6.11111e+06	86.9501	1.30425	1.268e+08	126.8	21.4371	1.77677e-12	1.20287e+08	120.287	17.4764
	40	9e-06	4.44444e+06	67.0893	1.00634	1.19585e+08	119.585	22.4999	1.77677e-12	1.13439e+08	113.439	18.9573
	34	9e-06	3.77778e+06	22.8092	0.342138	2.94919e+08	294.919	58.8449	1.77677e-12	2.79956e+08	279.956	50.3444
	25	9e-06	2.77778e+06	44.1411	0.662116	1.1365e+08	113.65	25.5143	1.77677e-12	1.07806e+08	107.806	22.3363
	38	9e-06	4.22222e+06	79.1005	1.18651	9.65283e+07	96.5283	18.4961	1.77677e-12	9.15589e+07	91.5589	15.6571
	45	9e-06	5000000	68.5531	1.0283	1.31538e+08	131.538	23.758	1.77677e-12	1.24784e+08	124.784	19.7889
	23	9e-06	2.55556e+06	37.1996	0.557993	1.23969e+08	123.969	28.7753	1.77677e-12	1.176e+08	117.6	25.3332
	22	9e-06	2.44444e+06	41.0347	0.61552	1.07633e+08	107.633	25.4376	1.77677e-12	1.02097e+08	102.097	22.457
	22	9e-06	2.44444e+06	49.9573	0.749359	8.85409e+07	88.5409	20.9254	1.77677e-12	8.398e+07	83.98	18.4721
	12	9e-06	1.33333e+06	15.5187	0.232781	1.54671e+08	154.671	47.354	1.77677e-12	1.46743e+08	146.743	43.0985
	14	9e-06	1.55556e+06	24.6357	0.369536	1.14031e+08	114.031	32.6193	1.77677e-12	1.08168e+08	108.168	29.4954
	27	9e-06	3000000	60.0313	0.900469	9.04155e+07	90.4155	19.6925	1.77677e-12	8.57587e+07	85.7587	17.144
	35	9e-06	3.88889e+06	32.1568	0.482353	2.16662e+08	216.662	42.7715	1.77677e-12	2.05605e+08	205.605	36.4905
	33	9e-06	3.66667e+06	35.8685	0.538028	1.83614e+08	183.614	37.0442	1.77677e-12	1.74222e+08	174.222	31.7591
	62	9e-06	6.88889e+06	89.4656	1.34198	1.3879e+08	138.79	22.6057	1.77677e-12	1.31667e+08	131.667	18.1758
	39	9e-06	4.33333e+06	77.8823	1.16823	1.00586e+08	100.586	19.0958	1.77677e-12	9.54096e+07	95.4096	16.1262
	87	9e-06	9.66667e+06	138.045	2.07067	1.2634e+08	126.34	18.6942	1.77677e-12	1.1985e+08	119.85	14.3927
	49	9e-06	5.44444e+06	76.2738	1.14411	1.2876e+08	128.76	22.6003	1.77677e-12	1.22147e+08	122.147	18.6591
	19	9e-06	2.11111e+06	52.6773	0.79016	7.26085e+07	72.6085	18.2292	1.77677e-12	6.8864e+07	68.864	16.2319
	30	9e-06	3.33333e+06	28.8906	0.43336	2.06863e+08	206.863	43.2603	1.77677e-12	1.96299e+08	196.299	37.3797
	34	4e-06	8500000	124.301	1.86452	1.23404e+08	123.404	24.6226	1.77677e-12	1.17063e+08	117.063	21.0515
	23	9e-06	2.55556e+06	36.3658	0.545486	1.26784e+08	126.784	29.4286	1.77677e-12	1.20271e+08	120.271	25.9087
	31	9e-06	3.44444e+06	39.9789	0.599684	1.55096e+08	155.096	32.0333	1.77677e-12	1.47146e+08	147.146	27.6012
	7	9e-06	777778	9.47123	0.142068	1.47913e+08	147.913	57.905	1.77677e-12	1.40327e+08	140.327	53.5791
	10	9e-06	1.11111e+06	29.287	0.439305	6.87563e+07	68.7563	22.8453	1.77677e-12	6.52094e+07	65.2094	20.9207
	24	9e-06	2.66667e+06	140.335	2.10503	3.45292e+07	34.5292	7.87892	1.77677e-12	3.27435e+07	32.7435	6.91452
	12	9e-06	1.33333e+06	17.9769	0.269654	1.33739e+08	133.739	40.9455	1.77677e-12	1.26873e+08	126.873	37.2628
	108	9e-06	12000000	119.451	1.79177	1.80487e+08	180.487	25.3063	1.77677e-12	1.71252e+08	171.252	18.9048
	32	9e-06	3.55556e+06	44.9368	0.674052	1.42575e+08	142.575	29.0971	1.77677e-12	1.35259e+08	135.259	25.0055
	25	9e-06	2.77778e+06	46.0036	0.690054	1.09087e+08	109.087	24.49	1.77677e-12	1.03476e+08	103.476	21.4391
	33	9e-06	3.66667e+06	71.6052	1.07408	9.26299e+07	92.6299	18.6881	1.77677e-12	8.78599e+07	87.8599	16.0161
	24	9e-06	2.66667e+06	40.6095	0.609143	1.18547e+08	118.547	27.0502	1.77677e-12	1.12454e+08	112.454	23.7471
	16	9e-06	1.77778e+06	42.9083	0.643625	7.50505e+07	75.0505	20.2636	1.77677e-12	7.11808e+07	71.1808	18.2071
	7	9e-06	777778	18.6625	0.279937	7.54899e+07	75.4899	29.5528	1.77677e-12	7.15976e+07	71.5976	27.3372
	4	9e-06	444444	7.73602	0.11604	1.03835e+08	103.835	52.9866	1.77677e-12	9.84928e+07	98.4928	49.5338
	31	9e-06	3.44444e+06	59.1636	0.887454	1.05212e+08	105.212	21.7303	1.77677e-12	9.97988e+07	99.7988	18.72
	14	9e-06	1.55556e+06	28.1789	0.422684	9.98029e+07	99.8029	28.5493	1.77677e-12	9.46661e+07	94.6661	25.8138
	24	9e-06	2.66667e+06	45.4757	0.682136	1.05965e+08	105.965	24.1793	1.77677e-12	1.00514e+08	100.514	21.2257
NE-14A	NS	Area	RhoS	U(ppm)	σU (ppm)	ζICP-METHOD	ζICP-METHOD (Ma)	σ Age (Ma)-ζICP	𝝍-parameter	𝝍-Age	𝝍-Age(Ma)	σ Age (Ma) 𝝍
	34	1.6e-05	2125000	37.0525	0.555788	102.978		18.0318	1.77677e-12	9.59611e+07	95.9611	17.2196
	73	1.6e-05	4562500	46.024	0.69036	176.979		21.6376	1.77677e-12	1.64983e+08	164.983	21.184
	44	1.6e-05	2750000	25.9928	0.389892	188.706		29.2198	1.77677e-12	1.75926e+08	175.926	28.1017
	42	1.6e-05	2625000	42.2137	0.633205	111.581		17.6632	1.77677e-12	1.03982e+08	103.982	17.0025
	56	1.6e-05	3500000	43.7449	0.656174	143.214		19.7958	1.77677e-12	1.33483e+08	133.483	19.2439
	16	1.6e-05	1000000	8.07591	0.121139	220.315		55.6264	1.77677e-12	2.05428e+08	205.428	52.5459
	49	1.6e-05	3062500	40.0928	0.601392	136.796		20.1314	1.77677e-12	1.27497e+08	127.497	19.4762
	36	1.6e-05	2250000	22.0739	0.331108	181.903		30.9913	1.77677e-12	1.69578e+08	169.578	29.7148
	29	1.6e-05	1812500	22.3423	0.335135	145.187		27.4445	1.77677e-12	1.35324e+08	135.324	26.1738
	70	1.6e-05	4375000	66.6605	0.999907	117.711		14.6713	1.77677e-12	1.09698e+08	109.698	14.3921
	59	1.6e-05	3687500	47.6319	0.714479	138.623		18.7003	1.77677e-12	1.29201e+08	129.201	18.2151
	45	1.6e-05	2812500	41.3154	0.619732	122.051		18.6986	1.77677e-12	1.13745e+08	113.745	18.0383
	30	1.6e-05	1875000	18.0863	0.271295	184.963		34.3963	1.77677e-12	1.72433e+08	172.433	32.835
	49	1.6e-05	3062500	55.3467	0.8302	99.3828		14.6255	1.77677e-12	9.26086e+07	92.6086	14.1468
	37	1.6e-05	2312500	26.652	0.39978	155.165		26.0917	1.77677e-12	1.44631e+08	144.631	25.0317
	53	1.6e-05	3312500	34.8552	0.522827	169.76		24.0778	1.77677e-12	1.58248e+08	158.248	23.3623
	19	1.6e-05	1187500	13.5822	0.203732	156.339		36.2896	1.77677e-12	1.45726e+08	145.726	34.3489
	27	9e-06	3000000	18.0109	0.270163	294.647		57.653	1.77677e-12	2.74843e+08	274.843	54.944
	38	1.6e-05	2375000	38.6855	0.580283	110.173		18.2917	1.77677e-12	1.0267e+08	102.67	17.5571
	36	1.6e-05	2250000	34.5657	0.518486	116.755		19.8919	1.77677e-12	1.08807e+08	108.807	19.066
	23	1.6e-05	1437500	18.5698	0.278547	138.612		29.3149	1.77677e-12	1.29191e+08	129.191	27.8302
	52	1.6e-05	3250000	51.811	0.777164	112.549		16.1067	1.77677e-12	1.04885e+08	104.885	15.6127
	30	1.6e-05	1875000	23.7957	0.356936	141.065		26.233	1.77677e-12	1.31479e+08	131.479	25.0364
	38	1.6e-05	2375000	26.6294	0.399441	159.441		26.4714	1.77677e-12	1.4862e+08	148.62	25.4148
	49	1.6e-05	3062500	44.1099	0.661649	124.457		18.3156	1.77677e-12	1.15989e+08	115.989	17.7184
	20	1.6e-05	1250000	17.2658	0.258987	129.725		29.3676	1.77677e-12	1.20902e+08	120.902	27.8147
	47	1.6e-05	2937500	40.7973	0.61196	129.024		19.3646	1.77677e-12	1.20248e+08	120.248	18.7077
	37	1.6e-05	2312500	27.9797	0.419695	147.886		24.8677	1.77677e-12	1.37841e+08	137.841	23.8565
	16	1.6e-05	1000000	18.835	0.282525	95.3884		24.0842	1.77677e-12	8.88847e+07	88.8847	22.7356
	51	1.6e-05	3187500	32.5396	0.488095	174.908		25.2601	1.77677e-12	1.63051e+08	163.051	24.4766
	33	1.6e-05	2062500	36.3181	0.544771	101.979		18.1144	1.77677e-12	9.5029e+07	95.029	17.323
	39	1.6e-05	2437500	27.9218	0.418827	156.103		25.598	1.77677e-12	1.45506e+08	145.506	24.5936
	26	1.6e-05	1625000	21.6239	0.324358	134.604		26.8231	1.77677e-12	1.25452e+08	125.452	25.5222
	39	1.6e-05	2437500	30.852	0.46278	141.438		23.1933	1.77677e-12	1.31827e+08	131.827	22.2815
	45	1.6e-05	2812500	36.8721	0.553081	136.604		20.9282	1.77677e-12	1.27318e+08	127.318	20.1907
	51	1.6e-05	3187500	30.3861	0.455792	187.126		27.0246	1.77677e-12	1.74452e+08	174.452	26.1881
	45	1.6e-05	2812500	35.2605	0.528908	142.779		21.8742	1.77677e-12	1.33077e+08	133.077	21.1041
	30	1.6e-05	1875000	21.004	0.31506	159.585		29.6769	1.77677e-12	1.48754e+08	148.754	28.326
	54	1.6e-05	3375000	51.2521	0.768782	118.102		16.6048	1.77677e-12	1.10063e+08	110.063	16.1179
NE-15A	NS	Area	RhoS	U(ppm)	σU (ppm)	ζICP-METHOD	ζICP-METHOD (Ma)	σ Age (Ma)-ζICP	𝝍-parameter	𝝍-Age	𝝍-Age(Ma)	σ Age (Ma) 𝝍
	38	1.6e-05	2375000	24.5159	0.367738	173.003		28.7231	1.77677e-12	1.65356e+08	165.356	28.2768
	46	1.6e-05	2875000	62.6189	0.939284	82.5708		12.5192	1.77677e-12	7.88964e+07	78.8964	12.3911
	20	1.6e-05	1250000	14.2406	0.213609	156.95		35.5308	1.77677e-12	1.50004e+08	150.004	34.5098
	39	1.6e-05	2437500	30.5069	0.457604	143.02		23.4527	1.77677e-12	1.36685e+08	136.685	23.1026
	28	1.6e-05	1750000	19.3674	0.29051	161.508		31.0513	1.77677e-12	1.54363e+08	154.363	30.3438
	10	1.6e-05	625000	6.57084	0.0985626	169.903		54.0626	1.77677e-12	1.62391e+08	162.391	52.0988
	19	1.6e-05	1187500	37.3204	0.559806	57.3368		13.3091	1.77677e-12	5.47806e+07	54.7806	12.9123
	22	1.6e-05	1375000	20.6435	0.309652	119.445		25.8133	1.77677e-12	1.14144e+08	114.144	25.107
	27	1.6e-05	1687500	43.4524	0.651786	69.912		13.6795	1.77677e-12	6.6798e+07	66.798	13.3536
	40	1.6e-05	2500000	24.5744	0.368617	181.554		29.4145	1.77677e-12	1.73534e+08	173.534	28.9999
	28	1.6e-05	1750000	21.1097	0.316646	148.33		28.5176	1.77677e-12	1.41761e+08	141.761	27.8666
	19	1.6e-05	1187500	10.4119	0.156179	203.197		47.1665	1.77677e-12	1.94235e+08	194.235	45.783
	17	1.6e-05	1062500	10.7789	0.161684	175.991		43.1348	1.77677e-12	1.68213e+08	168.213	41.8004
	23	1.6e-05	1437500	16.2009	0.243013	158.633		33.549	1.77677e-12	1.51613e+08	151.613	32.6604
	42	1.6e-05	2625000	22.6082	0.339123	206.803		32.7367	1.77677e-12	1.97685e+08	197.685	32.3241
	27	1.6e-05	1687500	24.2746	0.364118	124.614		24.383	1.77677e-12	1.19086e+08	119.086	23.8065
	29	1.6e-05	1812500	32.3455	0.485182	100.635		19.0229	1.77677e-12	9.61628e+07	96.1628	18.5994
	25	1.6e-05	1562500	20.723	0.310844	135.049		27.4282	1.77677e-12	1.29062e+08	129.062	26.7402
	19	1.6e-05	1187500	6.57476	0.0986213	318.894		74.0223	1.77677e-12	3.04949e+08	304.949	71.8791
	29	1.6e-05	1812500	18.8824	0.283236	171.44		32.407	1.77677e-12	1.63861e+08	163.861	31.6934
	16	1.6e-05	1000000	14.8346	0.222519	120.872		30.5184	1.77677e-12	1.15508e+08	115.508	29.5456
	19	1.6e-05	1187500	24.803	0.372046	86.0804		19.9812	1.77677e-12	8.22509e+07	82.2509	19.3873
	19	1.6e-05	1187500	13.6641	0.204961	155.413		36.0747	1.77677e-12	1.48534e+08	148.534	35.0108
	16	1.6e-05	1000000	18.8988	0.283482	95.0687		24.0035	1.77677e-12	9.08422e+07	90.8422	23.2363
	33	1.6e-05	2062500	13.5154	0.202732	270.458		48.0412	1.77677e-12	2.58589e+08	258.589	47.1385
	22	1.6e-05	1375000	20.1536	0.302304	122.321		26.4348	1.77677e-12	1.16894e+08	116.894	25.7118
	15	1.6e-05	937500	12.9651	0.194477	129.569		33.7665	1.77677e-12	1.23823e+08	123.823	32.6654
	27	1.6e-05	1687500	22.6053	0.33908	133.721		26.1649	1.77677e-12	1.27793e+08	127.793	25.5471
	44	1.6e-05	2750000	26.211	0.393165	187.158		28.98	1.77677e-12	1.78893e+08	178.893	28.6533
	17	1.6e-05	1062500	11.5559	0.173338	164.308		40.2714	1.77677e-12	1.5704e+08	157.04	39.024
	11	1.6e-05	687500	16.4715	0.247073	75.1078		22.8009	1.77677e-12	7.17638e+07	71.7638	21.9832
	24	1.6e-05	1500000	9.46009	0.141901	280.79		58.1688	1.77677e-12	2.68477e+08	268.477	56.6949
	23	1.6e-05	1437500	62.9076	0.943614	41.2281		8.71927	1.77677e-12	3.93879e+07	39.3879	8.4849
	25	1.6e-05	1562500	20.7635	0.311453	134.787		27.3751	1.77677e-12	1.28813e+08	128.813	26.6885
	19	1.6e-05	1187500	12.0679	0.181018	175.691		40.7818	1.77677e-12	1.67927e+08	167.927	39.5819
	21	1.6e-05	1312500	15.1606	0.227408	154.824		34.2255	1.77677e-12	1.47971e+08	147.971	33.2675
	16	1.6e-05	1000000	21.4805	0.322207	83.7166		21.1372	1.77677e-12	7.99916e+07	79.9916	20.4608
	10	1.6e-05	625000	17.7013	0.265519	63.5932		20.2351	1.77677e-12	6.07594e+07	60.7594	19.493
	10	1.6e-05	625000	15.0969	0.226453	74.5007		23.7058	1.77677e-12	7.11835e+07	71.1835	22.8373
	12	1.6e-05	750000	11.116	0.166741	120.979		35.1842	1.77677e-12	1.1561e+08	115.61	33.9549
LLM-55	NS	Area	RhoS	U(ppm)	σU (ppm)	ζICP-METHOD	ζICP-METHOD (Ma)	σ Age (Ma)-ζICP	𝝍-parameter	𝝍-Age	𝝍-Age(Ma)	σ Age (Ma) 𝝍
	30	1.6e-05	1875000	27.6907	0.41536	121.409		22.5776	1.77677e-12	1.16022e+08	116.022	21.9847
	37	1.6e-05	2312500	53.7087	0.805631	77.4646		13.026	1.77677e-12	7.40162e+07	76.059	13.0856
	13	1.6e-05	812500	9.31459	0.139719	155.982		43.6113	1.77677e-12	1.49078e+08	153.168	43.1857
	28	1.6e-05	1750000	22.0051	0.330077	142.36		27.3699	1.77677e-12	1.36053e+08	139.79	27.3526
	27	1.6e-05	1687500	25.414	0.38121	119.078		23.2998	1.77677e-12	1.13794e+08	116.924	23.2704
	36	1.6e-05	2250000	26.8927	0.403391	149.684		25.502	1.77677e-12	1.43056e+08	146.983	25.6063
	42	1.6e-05	2625000	21.2128	0.318192	220.177		34.8538	1.77677e-12	2.10479e+08	216.225	35.1204
	29	1.6e-05	1812500	18.2802	0.274203	177.01		33.46	1.77677e-12	1.69188e+08	173.823	33.4604
	29	1.6e-05	1812500	21.5946	0.323919	150.156		28.3838	1.77677e-12	1.43508e+08	147.447	28.383
	30	1.6e-05	1875000	28.8774	0.433161	116.464		21.6581	1.77677e-12	1.11295e+08	114.357	21.6693
	27	1.6e-05	1687500	56.5886	0.84883	53.7503		10.5172	1.77677e-12	5.13534e+07	52.7733	10.503
	38	1.6e-05	2375000	98.3204	1.47481	43.5742		7.23448	1.77677e-12	4.16296e+07	42.7815	7.27137
	20	1.6e-05	1250000	13.651	0.204765	163.644		37.0462	1.77677e-12	1.56406e+08	160.694	36.845
	22	1.6e-05	1375000	16.0587	0.24088	153.145		33.0962	1.77677e-12	1.46366e+08	150.382	32.9563
	20	1.6e-05	1250000	25.0572	0.375858	89.6669		20.299	1.77677e-12	8.56789e+07	88.0415	20.1867
	21	1.6e-05	1312500	14.5703	0.218555	161.018		35.5948	1.77677e-12	1.53894e+08	158.115	35.4231
	37	1.6e-05	2312500	30.3232	0.454848	136.577		22.966	1.77677e-12	1.30523e+08	134.11	23.0729
	26	1.6e-05	1625000	22.8478	0.342717	127.464		25.4003	1.77677e-12	1.2181e+08	125.16	25.3534
	29	1.6e-05	1812500	21.6938	0.325407	149.478		28.2555	1.77677e-12	1.42859e+08	146.78	28.2547
	15	1.6e-05	937500	16.5856	0.248784	101.507		26.4533	1.77677e-12	9.6996e+07	99.6682	26.226
	28	1.6e-05	1750000	54.7307	0.82096	57.616		11.0772	1.77677e-12	5.50474e+07	56.569	11.0688
	26	1.6e-05	1625000	16.8563	0.252845	172.17		34.3091	1.77677e-12	1.64559e+08	169.068	34.2478
	15	1.6e-05	937500	23.0785	0.346177	73.1102		19.053	1.77677e-12	6.98546e+07	71.7832	18.8885
	16	1.6e-05	1000000	14.0864	0.211295	127.229		32.1236	1.77677e-12	1.21586e+08	124.93	31.8686
	23	1.6e-05	1437500	20.1971	0.302957	127.554		26.9761	1.77677e-12	1.21897e+08	125.248	26.8775
	19	1.6e-05	1187500	31.8123	0.477185	67.2126		15.6015	1.77677e-12	6.42183e+07	65.9921	15.5052
	20	1.6e-05	1250000	19.282	0.289229	116.283		26.3243	1.77677e-12	1.11121e+08	114.179	26.1797
	41	1.6e-05	2562500	40.966	0.61449	112.236		17.9715	1.77677e-12	1.07253e+08	110.205	18.096
	33	1.6e-05	2062500	20.3266	0.304899	181.09		32.1668	1.77677e-12	1.7309e+08	177.83	32.2433
	29	1.6e-05	1812500	23.7595	0.356393	136.618		25.8248	1.77677e-12	1.30563e+08	134.151	25.8236
	47	1.6e-05	2937500	26.3108	0.394663	198.977		29.8635	1.77677e-12	1.90198e+08	195.399	30.1757
	26	1.6e-05	1625000	20.4604	0.306905	142.174		28.3318	1.77677e-12	1.35875e+08	139.607	28.28
	35	1.6e-05	2187500	17.6995	0.265493	219.906		37.9747	1.77677e-12	2.10219e+08	215.959	38.1115
	14	1.6e-05	875000	7.23199	0.10848	215.355		58.057	1.77677e-12	2.05865e+08	211.488	57.5313
	38	1.6e-05	2375000	31.6383	0.474575	134.46		22.3239	1.77677e-12	1.28499e+08	132.03	22.4406
	9	1.6e-05	562500	31.5341	0.473012	32.2059		10.7955	1.77677e-12	3.07674e+07	31.6195	10.6611
	35	1.6e-05	2187500	21.3228	0.319842	183.063		31.6124	1.77677e-12	1.74977e+08	179.768	31.7248
	37	1.6e-05	2312500	22.7982	0.341973	181.029		30.4409	1.77677e-12	1.73032e+08	177.77	30.5844
	40	1.6e-05	2500000	33.3232	0.499849	134.381		21.7717	1.77677e-12	1.28424e+08	131.953	21.9107
